# Supplementary material
Source: PubMed Central journal article supplement (PMC1851093)
Supplement: pnas_0609054104_1.pdf [file pnas_0609054104_1.pdf]

**YR1**  
4 Mb

**YR2**  
6 Mb

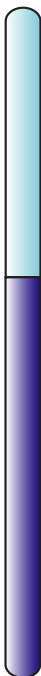

2.8 Mb

3.5 Mb

2.6 Mb

pMM4G7  
470 kb  
pMM24-58G10  
pMM2D3  
pMM23-101C6  
pMM23-360C7  
pMM23-118G8  
pMM23-300E6  
pMM8H2  
pMM23-205B1  
pMM23-205E6  
pMM23-348H6  
pMM23-108B3  
pMM23-145D11  
pMM23-287F10  
pMM23-372H9  
pMM23-123D8  
pMM23-437F9  
pMM16A2  
pMM23-198A1  
pMM23-144H6  
pMM23-77F9  
pMM23-200H8  
pMM23-277H2  
pMM23-863F12  
pMM23-63B5  
pMM23-173B4  
pMM23-291C10  
pMM23-70G5  
2.2-kb BamHI repeats

pMM23-431A8  
pMM23-338F12  
pMM23-354E2  
pMM23-477F3  
pMM23-480H6  
pMM23-284C9  
pMM19B4  
pMM23-90G5  
pMM23-355D5  
pMM23-350E4  
pMM23-166C5  
pMM23-97D8  
pMM23-165G8  
pMM24-26B6  
pMM23-627E2  
pMM23-636F5  
pMM23-729D7  
pMM24-38C9  
pMM23-547D3  
pMM23-666C5  
pMM23-217D8  
pMM23-354D1  
pMM23-212C1  
pMM23-507A1  
pMM23-589F12  
pMM23-513H5  
pMM23-104E4  
pMM23-179A5  
pMM23-46E1  
pMM23-414C2  
pMM23-222E12  
pMM23-657H8  
pMM23-537D7

pMM23-359F1  
pMM24-95E6  
pMM23-635B8  
pMM23-408G1  
pMM23-265H6  
pMM23-420F5  
bridgeM420F5-M286B9  
pMM23-286B9  
pMM23-578C3  
pMM23-88B7  
pMM23-47H4  
pMM23-169B8  
bridgeM169B8-M402H5  
pMM23-402H5  
pMM23-508E5  
pMM23-435B3  
pMM23-526D2  
pMM23-54C8  
pMM23-516B5  
pMM23-468B3  
pMM23-530A10  
pMM24-22H6  
pMM23-546H7  
pMM23-313C1  
pMM53F7  
pMM23-41H12  
pMM23-45F5  
bridgeM45F5-M632E5  
pMM23-632E5

**Representative clones**

**Contig-A**

**Contig-B**
