# Supplementary material
Source: PubMed Central journal article supplement (PMC1851093)
Supplement: pnas_0609054104_2.pdf [file pnas_0609054104_2.pdf]

|      |                          |                          |
|------|--------------------------|--------------------------|
| Mp01 | PGPGTYNVDPASRTISP---     | S-PPAYTIAARFKLNLNSLN---- |
| Mp02 | :::::TPRAGT:-----        | G::F::PG:NDARKGOEG----   |
| Mp03 | :::::S:DAGIDGSSP:-----   | A:::MPG:::SGEGPK:----    |
| Mp04 | :::::IRGK:D-----         | G:::GKL:GAVGDR:----      |
| Mp05 | :::::A:ATFT:G-----       | A:::G::HEG:PDGP----      |
| Mp06 | :::::S:-----VDVRS---     | A::SLPQ:LGNLRTDDT----    |
| Mp07 | :::::A:SGNARILHTR-----   | E:::L:::PNNYQGPAS----    |
| Mp08 | :::::E:SLF:GDK-----      | G:::G:QDVKSPNN:----      |
| Mp09 | :::::A:::VGAS-----       | S:::PG:GHPSPGNEG----     |
| Mp10 | :::::A:E:R:K:G-----      | S:::G:S:PG:GENV----      |
| Mp11 | :::::S:LPGG:-----        | S:F::G:LGKGDPPF:----     |
| Mp12 | :::::A:S---PDVSSG-----   | S:S::G:HDQQHDERA----     |
| Mp13 | :::::P:SHHY-----         | K::MGL:LSAESADA:----     |
| Mp14 | :::::LVSR:D-----         | G::S:PG:NDKRAPDNL----    |
| Mp15 | :::::ANLPAG:-----        | :::R:Y:A:MGPKT----       |
| Mp16 | :::::TNIR:-----          | G:::SKIRTG:DTHV----      |
| Mp17 | :::::LPDG:-----          | A:F::G:IEKEDAFP:----     |
| Mp18 | :::::A:---PAVRSG-----    | S:S::G:QSQRD:RA----      |
| Mp19 | :::::P:CHDS-----         | K::MGH:YPAGPPDE:----     |
| Mp20 | :::::SAYLPGG-----        | T:FS::G:NEKHAPDEG----    |
| Mp21 | :::::S:SANLQAS-----      | S:F::G:Y:QGRGEQV----     |
| Mp22 | :::::S:S---:IDKSG-----   | A:::S:-L:YKGDTSN---      |
| Mp23 | :::::A:EA:HGT-----       | S:F::E:Y:AK::ERT----     |
| Mp24 | :::AS:KP:VNPTKHK-----    | S:F:MRK:PFWFYLGKPRD--    |
| Hs01 | :::KYLIPPTTGFMKHTPTKLRA: | :::SFRGAPM:LAENCS----    |
| Hs02 | :::RYNVNPKIL::GKDL---    | G::S:LG:YQTKTMLT-----    |
| Hs03 | :::D:FPEKSTKYVFD---      | A:SHS:S:T:AFRVDST----    |
| Hs04 | :::AA:MLPMVMGPNTVGKA:-Q: | SFS:KG:S::GGF:DDLHKT     |
| Hs05 | :::AA:RQTDVRV:KFK-----   | A:Q:M::VEPPGDKTLK---     |
| Hs06 | :::AHSPEKVTL:KP-----     | CA:VV:FGIKHSDYMTPLVDVE   |
