# Supplementary material
Source: PubMed Central journal article supplement (PMC1851093)
Supplement: pnas_0609054104_4.pdf [file pnas_0609054104_4.pdf]

M104E4 . 1 MPQNKKPPTGAASAKYVHQPNI FSRVQLSRNTRGSL E I FGGGPQTSSLLF SRTRSAWKDALHCAEP - VSEGSVSCNKD TIRPTLAEASSSPKI PTVSL  
F62B12 . 1 ::LL::::::::::S::::::::::E::::::::::P::::::::::Q::::SHLQ:HDTGKVVPSVSG:SPPS:QR:L:SGSGD

M104E4 . 1 TEDLMDGGPIDNLA VDSREDDVSKWLADAGKSVESPKSSMSYQARLS DCLGEDSEFSDSYMRSVVSIMSDSSVAPDRS VRDLEWDGVLPTQMETNVTRTP  
F62B12 . 1 HPSV VSSAALYPRCC - -VQ::::::::::T::EV:GDTSELPS:-VS:PLEFVSDTRDNT:VNLEASSKTL:GYP:E:TKTRVEQD::E::KHRGKKISGFS

M104E4 . 1 DWSNEVVSQRAVQWGYGVVLKPTLSRGS GSAETERISRLSWTTGASDASSGMGTSSRTTSEGSSGESTFSSIIPGVSRNVKEALTSFQLAFVVC DALNPE  
F62B12 . 1 EI:D:AL:E::A::::::::::SNN::::::::::G::::::::::S::T::AL:K::::::::::AC:S::PM:::L:K::::::::::A::::::::::A:

M104E4 . 1 YPVLYASAGFFSMTGYTAKEVVGRNCRFLQ GQYTD AKDIEMI RDALVNRKSFSGKLLNYKKDGI PFWNLLTISPIKDEEGRIIKYIGMQAEV TENGRTSS  
F62B12 . 1 ::I::::::::::H::A::G::REGNIYT::::::::::S::::::::::R:DG::L:::::::::::SAAIGK

M104E4 . 1 SMNEEPI SAYASRISSAELRDGSLDISGSPLPSVKHGSATVCHPSCPSAREFD FDS PAVNRYLS SSSRHSMDARS - -KS ISSQKSVRVS AENF ASSPGI  
F62B12 . 1 ALDQNGVP:DVKNLFE:GRKKT KDNRTAGGVT:ETRVRHKISE-----:SNCQRTSR SQ::::::::::Q:FEVS:NVT LALDVHTPLKTGT:VA:F:AEA

M104E4 . 1 APRVNI IDVEEPSVRSECGSIDTSKSGKRTSGI IRLFKKLNKG FSSPKGGLRDKNDG LLNSTKVFVDEVFNF DDEESETDDVERKERRSGIDFNTSSFTQ  
F62B12 . 1 VDSGGFLE:PK-AL:G:SSCMVDT:NT::::SLLKM::::::::::R:--:R:S::YSHEDPIAVEDHN:V:SDP:::D--V::F:G:Q:::SFYSS:E:L VG

M104E4 . 1 SDGMC RGRGSSQS - RTSPDKQPACGKSGDTAGIRGQNDLHLGIEQH CDFHTSQ - KPVQGNRR LALGTGRRSAQHVT - -TEGRLNELKVYTMEKDRRH SVA  
F62B12 . 1 KQELDQTSEFMRVGK:NRQSRQFSEERR:C:: - :MDCEIP:RQ:RFSGD:SRPGSSEH:IG:KVVS Y:::::EYPVGAVNAF:KNEGLASHAI:::::I:

M104E4 . 1 SMPSSG-TD VNVNGKSQFCIVHQKSPS- 718 aa  
F62B12 . 1 TV::VTRPSFS:D::::::::::PTA:GH 712 aa
