# Supplementary material
Source: PubMed Central journal article supplement (PMC1851093)

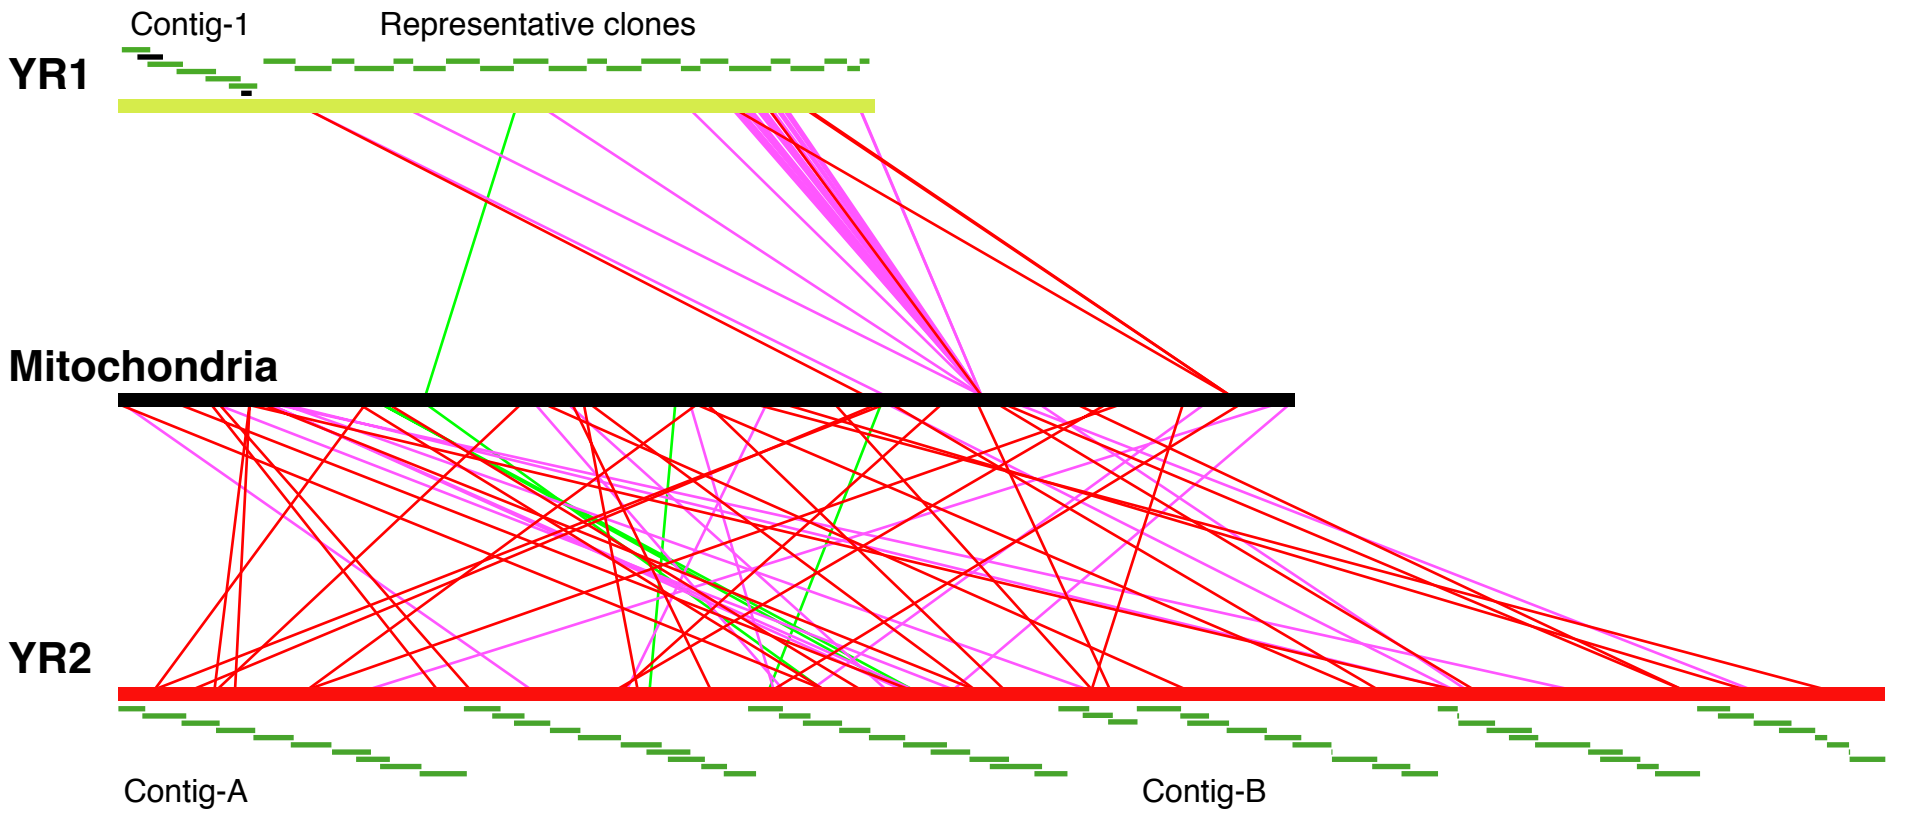

Supplement: pnas_0609054104_3.pdf [file pnas_0609054104_3.pdf]
